# Supplementary material for: Tracking daily fatigue fluctuations in multiple sclerosis: ecological momentary assessment provides unique insights
Source: J Behav Med. 2017 Mar 9;40(5):772–83. doi: 10.1007/s10865-017-9840-4 (PMC5613039; doi:10.1007/s10865-017-9840-4)
Supplement: Supplementary file 2 — Supplementary material 2 (DOCX 18 kb) [file 10865_2017_9840_MOESM2_ESM.docx]

Supplementary 2

The two exploratory factor analyses (EFA) presented below were conducted with MPlus 7.3.

**EFA1: Stress**

Table S2A. Stressor items presented within EMA schedule.

| Eight items, prefixed by ‘Since the last event….’  Response: 0 (Not at all) – 10 (Very much so) |
| --- |
| I did a lot of work  I dealt a lot with other people’s matters  I performed some of my tasks inadequately  Others undervalued my work  I felt discontented with the type of work Im doing  I had a disagreement with someone  I performed tasks that allowed no mistakes  It was important to ensure good relations with another person |

Eight stressor items were presented (see Table A) based on the eight domains of the Trier Inventory of Chronic Stress.1 Each item was prefixed with ‘Since the last event…’ with response sliders from 0 ‘Not at all’ to 10 ‘Very much so’. An exploratory factor analysis (EFA) for categorical outcome variables with cluster-robust computations of standard errors and chi-squared statistics to account for repeated measurements within subjects was conducted using Mplus 7.3. For the EFA, stressor responses were categorized into five categories to account for non-normality of their distributions. The results suggested a 3-factor solution with good model fit, χ² = 12.3; df = 7; *p* = .09; Root Mean Square Error of Approximation (RMSEA) = .021; *p* (RMSEA ≤ .05) = .99; Comparative Fit Index (CFI) = .99; Tucker-Lewis-Index (TLI) = .97. Four items loaded onto a major factor (items: ‘others undervalued my work’; ‘I performed some of my tasks inadequately’; ‘I had a disagreement with someone’; ‘I felt discontented with the type of work I was doing’). The remaining two factors were less clear, so were discarded. A Daily Life Stress scale score was computed as the mean average of the four constituent items, but estimation of its composite within-subject reliability2 showed limited reliability (ωwithin = .48). Due to this limited reliability, this factor was also discarded and we decided to use the individual stressor items as predictors, in an exploratory analysis.

**EFA2: Affect**

Table S2B. Affect items presented within EMA schedule

| Fifteen items, prefixed by ‘At the moment, I feel….’  Response: 0 (Not at all) – 10 (Very much so) |
| --- |
| Distressed  Upset  Guilty  Irritable  Ashamed  Anxious  Calm  Down  Worried  Angry |

Momentary affect was measured with 15 mood adjectives, prefixed by ‘At the moment, I feel…’ with response sliders from 0 ‘Not at all’ to 10 ‘Very much so’. A cluster-robust EFA for categorical outcome variables (using the same cut-off values as for the stressor items) yielded a 2-factor solution, with acceptable model fit, χ² = 333.7; df = 76; p < .001; RMSEA = .045; p (RMSEA ≤ .05) = .94; CFI = .94; TLI = .92. Ten items loaded onto one factor, ‘Negative Affect’ (items: ‘distressed’, ‘upset’, ‘guilty’, ‘irritable’, ‘ashamed’, ‘anxious’, ‘calm’ [reverse scored], ‘down’, ‘worried’, ‘angry’) and five items loaded onto another factor, ‘Positive Affect’ (items: ‘proud’, ‘alert’, ‘determined’, ‘energetic’, ‘satisfied’). Scale scores were computed as the mean of constituent items and demonstrated satisfactory within-subject reliability of ωwithin = .86 for Negative Affect and ωwithin = .68 for Positive Affect.

**References**

1. Schulz P, Schlotz W, Becker P. *Trierer Inventar zum Chronischen Stress (TICS) [Trier Inventory for Chronic Stress (TICS)]*. Gottingen: Hogrefe Verlag, 2004.

2. Geldhof GJ, Preacher KJ, Zyphur MJ. Reliability estimation in a multilevel confirmatory factor analysis framework. Psychological Methods 2014;**19**(1):72-91.
