# Supplementary material for: Tracking daily fatigue fluctuations in multiple sclerosis: ecological momentary assessment provides unique insights
Source: J Behav Med. 2017 Mar 9;40(5):772–83. doi: 10.1007/s10865-017-9840-4 (PMC5613039; doi:10.1007/s10865-017-9840-4)
Supplement: Supplementary file 3 — Supplementary material 3 (DOCX 23 kb) [file 10865_2017_9840_MOESM3_ESM.docx]

Supplementary 3

**Technical details of multilevel models used in the study**

All specified models use standard notation1.To test typical diurnal (daily) fatigue patterns, linear and quadratic models of *Momentary Fatigue Severity* were explored for best fit by chi square tests on the deviance statistic (difference in -2 Log Likelihood). Consecutive growth models were built using all data, adding complexity with each step, until a random quadratic covariate growth model was derived as the best fit (see Equation 1 below; Model A). This final model had an unstructured variance-covariance matrix to model the residuals at level-2, and a diagonal matrix modelling residuals at level-3. Group differences in diurnal fatigue patterns were examined by adding group as a binary fixed effect at level-3 with group by time cross-level interaction effects.

As stated in the manuscript, all subsequent models are based on Model A with the addition of predictors of interest.

**Equation S1 (Model A)** - Random quadratic covariate growth model.

Where ~ and ~ and ~

Where is the value of Momentary Fatigue Severity for individual on day at assessment , is the time of day for individual on day at assessment , is the level of depressive symptoms (HADS-D score) for individual , and is the rating of chronic stress (CSSS score) for individual . Fixed effects are denoted by , with indicating the average intercept, the average effect of , the average effect of , the average effect of , and the average effect of . Random effects at level-3 (individual) are indicated by , with denoting the deviation of the intercept for individual from the average intercept, denoting the deviation of the effect for individual from the average effect of . Random effects at level-2 (day) are indicated by , with denoting the deviation of the intercept on day from the average intercept for individual , denoting the deviation of the effect for day from the average effect of of individual , and denoting the deviation of the 2 effect for day from the average effect of 2 for individual . indicates the model residuals at level-1 (assessments).

The remaining models are presented below in equation form:

**Equation S2 (Model B)** – Testing the effects of physical exertion and sleep quality.

Where ~ and ~ and ~

*Note:* Fixed effect of group and group interactions added to the model to detect group differences and average within-group effects.

**Equation S3 (Model C)** – Testing the independent effects of each stressor type.

Where ~ and ~ and ~

*Note:* Fixed effect of group and group interactions added to the model to detect group differences and average within-group effects.

**Equation S4 (Model D)** – Testing the independent effects of negative and positive affect.

Where ~ and ~ and ~

*Note:* Fixed effect of group and group interactions added to the model to detect group differences and average within-group effects.

**References**

1. Snijders TAB, Bosker RJ. *Multilevel Analysis: An Introduction to Basic and Advanced Multilevel Modeling*. 2nd Edition ed. London, UK: SAGE Publications, 2012.
